# Supplementary material for: SERS Determination of Oxidative Stress Markers in Saliva Using Substrates with Silver Nanoparticle-Decorated Silicon Nanowires
Source: MDPI journal article supplement (doi:10.3390/bios13020273), 2023-02-14
Supplement: s1 [file s1]

Supplementary Materials

# SERS Determination of Oxidative Stress Markers in Saliva Using Substrates with Silver Nanoparticle-Decorated Silicon Nanowires

Anastasia Kanioura<sup>1</sup>, Georgia Geka<sup>1</sup>, Ioannis Kochylas<sup>2</sup>, Vlassis Likodimos<sup>2</sup>, Spiros Gardelis<sup>2</sup>, Anastasios Dimitriou<sup>3</sup>, Nikolaos Papanikolaou<sup>3</sup>, Sotirios Kakabakos<sup>1</sup> and Panagiota Petrou<sup>1,\*</sup>

<sup>1</sup> Immunoassays/Immunosensors Lab, Institute of Nuclear & Radiological Sciences & Technology, Energy & Safety, NCSR “Demokritos” Aghia Paraskevi 15341, Greece

<sup>2</sup> Section of Condensed Matter Physics, Department of Physics, National and Kapodistrian University of Athens, Zografou 15771, Greece

<sup>3</sup> Institute of Nanoscience & Nanotechnology, NCSR “Demokritos”, Aghia Paraskevi 15341, Greece

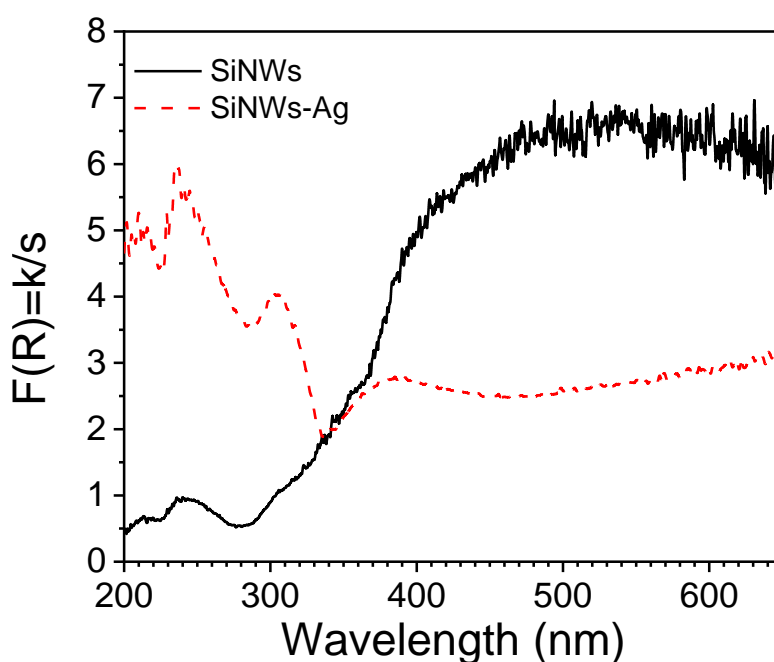

**Figure S1.** Absorption spectra from the diffuse reflection spectra by standard Kubelka-Munk Function  $F(R) = k/s$  of plain SiNWs (full line) and SiNWs decorated with Ag nanoparticles (dashed line); where  $k$  is the molar absorption coefficient, and  $s$  the scattering factor.

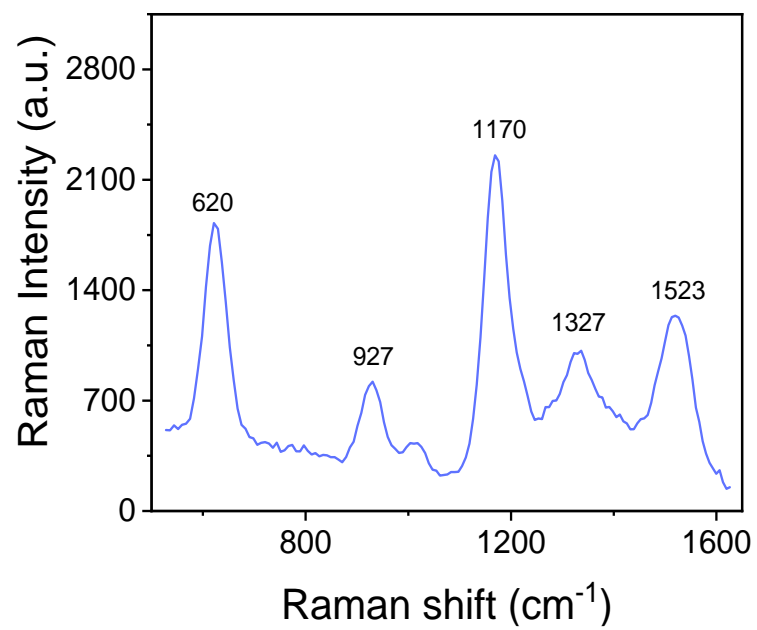

**Figure S2.** SERS spectrum of 42 mM aqueous TBA solution.
